# Supplementary material
Source: publisher figshare collection journal article supplement (https://frontiersin.figshare.com/ndownloader/files/28106937)
Supplement: Supplementary file [file 28106937]

| Scenario Development          |                                                                                                                                                               |
|-------------------------------|---------------------------------------------------------------------------------------------------------------------------------------------------------------|
| Date of Development:          | December 2019 / January 2020                                                                                                                                  |
| Scenario Developer(s):        | Bosco G, Paganini M, Mormando G, Garetto G                                                                                                                    |
| Affiliations/Institutions(s): | Department of Biomedical Sciences (DSB) and Department of Medicine, University of Padova (Padova, Italy);<br>ATIP Hyperbaric Treatment Center (Padova, Italy) |
| Contact E-mail:               | simulazione.dimed@unipd.it                                                                                                                                    |
| Last Revision Date:           | January 31st, 2020                                                                                                                                            |
| Revised By:                   | Fabris F, Camporesi M                                                                                                                                         |
| Version Number:               | 1.0                                                                                                                                                           |

## List of abbreviations

ATA: atmospheres absolute

BP: Blood Pressure

CRM: crisis resource management

COPD: Chronic Obstructive Pulmonary Disease

GCS: Glasgow Coma Scale

HBOT: Hyperbaric Oxygen Therapy

HR: Heart Rate

O<sub>2</sub>: oxygen

PNX: Pneumothorax

RR: Respiratory Rate

## Case Summary 02: A painful decompression

|                            |                                                                                                                                                                                                                                                  |
|----------------------------|--------------------------------------------------------------------------------------------------------------------------------------------------------------------------------------------------------------------------------------------------|
| <b>Scenario Title:</b>     | <b>A painful decompression</b>                                                                                                                                                                                                                   |
| Keywords:                  | Pneumothorax, hyperbaric medicine, multiplace hyperbaric chamber                                                                                                                                                                                 |
| Brief Description of Case: | A patient treated in a multiplace hyperbaric chamber for difficult healing of osteomyelitis, during decompression, notices sudden sharp right chest pain and dyspnea. Learners should suspect PNx, suspend decompression, and slowly decompress. |

| Goals and Objectives |                                                                                                                                                               |
|----------------------|---------------------------------------------------------------------------------------------------------------------------------------------------------------|
| Educational Goal:    | Management of a complication of decompression in a hyperbaric chamber                                                                                         |
| Medical Objectives:  | Recognize/suspect condition<br>Avoid rapid decompression of the chamber<br>Obtain assistance from outside<br>How to perform emergent PNx needle decompression |
| No CRM objectives    | --                                                                                                                                                            |

| Learners, Setting, and Personnel    |                                                              |          |                                 |                      |
|-------------------------------------|--------------------------------------------------------------|----------|---------------------------------|----------------------|
| Target Learners:                    | <input type="checkbox"/> Junior Learners                     |          | X Senior Learners               | X Staff              |
|                                     | X Physicians                                                 | X Nurses | <input type="checkbox"/> RTS    | X Inter-professional |
|                                     | X Other Learners: Trainees in Diving and Hyperbaric Medicine |          |                                 |                      |
| Location:                           | <input type="checkbox"/> Sim Lab                             | In Situ  | <input type="checkbox"/> Other: |                      |
| Recommended Number of Facilitators: | Instructors: 2                                               |          |                                 |                      |
|                                     | Confederates: 1 hyperbaric technician, 1 patient (mannequin) |          |                                 |                      |
|                                     | Sim Techs: 2                                                 |          |                                 |                      |

### Initial Patient Information

| Patient Chart                                                  |                           |            |         |                         |            |
|----------------------------------------------------------------|---------------------------|------------|---------|-------------------------|------------|
| Patient Name: Andrea                                           |                           |            | Age: 71 | Gender: M               | Weight: 76 |
| No monitor in the multiplace hyperbaric chamber. Patient alert |                           |            |         |                         |            |
| Temp: 36 °C                                                    | HR: 110 bpm, sinus rhythm | BP: 140/80 | RR: 24  | O <sub>2</sub> Sat: 95% |            |
| Allergies: none                                                |                           |            |         |                         |            |

|                                                                                                                           |                                                                               |
|---------------------------------------------------------------------------------------------------------------------------|-------------------------------------------------------------------------------|
| Past Medical History: active smoker, COPD; treated for difficult healing osteomyelitis to the leg on a previous fracture. | Current Medications: levofloxacin; inhaled b-agonist + ipratropium once daily |
|---------------------------------------------------------------------------------------------------------------------------|-------------------------------------------------------------------------------|

### Extra Patient Information

| Physical Exam                                             |                     |
|-----------------------------------------------------------|---------------------|
| <i>List any pertinent positive and negative findings.</i> |                     |
| Cardio: normal                                            | Neuro: normal       |
| Resp: normal, then tachypnea                              | Head & Neck: normal |
| Abdo: normal                                              | MSK/skin: normal    |
| Other: /                                                  |                     |

### Technical Requirements/Room Vision

| Patient                                       |
|-----------------------------------------------|
| X Mannequin ( <i>adult</i> )                  |
| <input type="checkbox"/> Standardized Patient |
| <input type="checkbox"/> Task Trainer         |

|                                                                                                                                         |
|-----------------------------------------------------------------------------------------------------------------------------------------|
| <input type="checkbox"/> Hybrid                                                                                                         |
| <b>Special Equipment Required, Required Medications, Moulage</b>                                                                        |
| None                                                                                                                                    |
| <b>Monitors at Case Onset</b>                                                                                                           |
| <input type="checkbox"/> Patient on a monitor with vitals displayed<br><input checked="" type="checkbox"/> Patient not yet on a monitor |

### Scenario Progression

| Scenario States, Modifiers, and Triggers                                                                                          |                                                                                                               |                                                                                  |                                                                                                                                                                    |                   |
|-----------------------------------------------------------------------------------------------------------------------------------|---------------------------------------------------------------------------------------------------------------|----------------------------------------------------------------------------------|--------------------------------------------------------------------------------------------------------------------------------------------------------------------|-------------------|
| Patient State/Vitals                                                                                                              | Patient Status                                                                                                | Learner Actions, Modifiers & Triggers to Move to Next State                      |                                                                                                                                                                    | Facilitator Notes |
| <b>1. Baseline State</b><br><br>Rhythm: sinus<br>HR: 110<br>BP: 140/80<br>RR: 24<br>O <sub>2</sub> SAT: 95%<br>T: 36°C<br>GCS: 15 | A patient in a hyperbaric chamber, during decompression, notices a sudden sharp right chest pain and dyspnea. | <u>Expected Learner Actions</u><br><br>The trainee should suspend decompression. | <u>Modifiers and triggers</u><br><br>Despite these actions, deterioration of PNX: the patient has even more pain and is more tachypneic<br><br>-->progression to 2 | -                 |

|                                                                                                                                        |                                                                                                                               |                                                                                                                                                                                                                                                                                                                 |                                                                                                                                                                                                                                                |   |
|----------------------------------------------------------------------------------------------------------------------------------------|-------------------------------------------------------------------------------------------------------------------------------|-----------------------------------------------------------------------------------------------------------------------------------------------------------------------------------------------------------------------------------------------------------------------------------------------------------------|------------------------------------------------------------------------------------------------------------------------------------------------------------------------------------------------------------------------------------------------|---|
| <b>2.Rhythm:</b><br>sinus<br><br>HR: 120<br><br>BP: 140/80<br><br>RR: 24<br><br>O <sub>2</sub> SAT: 95%<br><br>T: 36°C<br><br>GCS: 15  | The patient says that the dyspnea is getting worse                                                                            | <u>Expected Learner Actions</u><br><br>The trainee should ask for help and ask to put an IV catheter over the needle + disinfectant inside the hyperbaric chamber. Then ask to prepare the emergency trolley and a stretcher ready outside the chamber. Then restart slow decompression, informing the patient. | <u>Modifiers and triggers:</u><br><br>Despite these actions, patient deteriorates. Level of consciousness decreases to pain (on AVPU scale), the pulse is fast and superficial if checked -> patient is progressing to tension PNX --> go to 3 | - |
| <b>3.Rhythm:</b><br>sinus<br><br>HR: 140<br><br>BP: 80/40<br><br>RR: 30<br><br>O <sub>2</sub> SAT: 88%<br><br>T: 36 °C<br><br>GCS: 9   | Patient deteriorates. level of consciousness decreases to pain (on AVPU scale), the pulse is fast and superficial if checked. | The trainee should perform needle decompression of tension PNX.                                                                                                                                                                                                                                                 | Needle decompression of tension PNX--> resolution of symptoms<br><br>-->progression to 4<br><br>No needle decompression<br><br>-->deterioration of PNX: cardiac arrest → stop scenario if no needle decompression within 1 minute.             |   |
| <b>4.Rhythm:</b><br>sinus<br><br>HR: 110<br><br>BP: 140/80<br><br>RR: 24<br><br>O <sub>2</sub> SAT: 95%<br><br>T: °C 36<br><br>GCS: 15 | Resolution of symptoms, patients become alert again, still feeling pain on the affected site                                  | <u>Expected Learner Actions</u><br><br>The trainee should ask the technician outside to decompress the hyperbaric chamber slowly.                                                                                                                                                                               | -<br><br>-                                                                                                                                                                                                                                     | - |

## Facilitator Cheat Sheet & Debriefing Tips

- The facilitator asks the team, "How did you feel? What are the emotions you felt?"
- Brief Case Summary
- The facilitator invites the team to produce a "Plus/Delta/Solutions" chart describing: "what went well" (Plus); "what could be improved" (Delta); "what we will do next time" (Solutions).
- To help the team, the facilitator asks questions such as: "What actions or things would you perform again in the same clinical case in reality tomorrow"?
- Address the critical points (e.g., assessing the patient's level of consciousness, decompression when necessary, assessing possible causes of illness, etc.).
- Discuss errors or lack of actions and reflect on the causes to find solutions
- Conclusions on positive things done and answers found to possible errors

## References

1. Kot J, Michałkiewicz M, Sićko Z. Odma opłucnowa w trakcie leczenia hiperbarycznego [Pneumothorax during hyperbaric oxygenation]. *Anestezjol Intens Ter.* 2008 Jan-Mar;40(1):35-8.
2. Cakmak T, Battal B, Kara K, Metin S, Demirbas S, Yildiz S, Uzun G. A case of tension pneumothorax during hyperbaric oxygen therapy in an earthquake survivor with crush injury complicated by ARDS (adult respiratory distress syndrome). *Undersea Hyperb Med.* 2015 Jan-Feb;42(1):9-13.
3. Roberts DJ, Leigh-Smith S, Faris PD, Blackmore C, Ball CG, Robertson HL, Dixon E, James MT, Kirkpatrick AW, Kortbeek JB, Stelfox HT. Clinical Presentation of Patients With Tension Pneumothorax: A Systematic Review. *Ann Surg.* 2015 Jun;261(6):1068-78. Doi: 10.1097/SLA.0000000000001073.
4. American College of Surgeons. Committee on Trauma. Chapter 4: Thoracic Trauma. In: *Advanced trauma life Support® student course manual.* ISBN 78-0-9968262-3-5. Tenth Edition. p. 66.
